# Supplementary material
Source: HighWire-hosted journal article supplement (https://advances.sciencemag.org/content/suppl/2019/04/01/5.4.eaau7668)
Supplement: aau7668_SM.pdf [file aau7668_SM.pdf]

## Supplementary Materials for

### **Navigating the complexities of coordinated conservation along the river Nile**

J. R. Allan\*, N. Levin, K. R. Jones, S. Abdullah, J. Hongoh, V. Hermoso, S. Kark

\*Corresponding author. Email: [james.allan@uqconnect.edu.au](mailto:james.allan@uqconnect.edu.au)

Published 3 April 2019, *Sci. Adv.* **5**, eaau7668 (2019)

DOI: [10.1126/sciadv.aau7668](https://doi.org/10.1126/sciadv.aau7668)

#### **This PDF file includes:**

Fig. S1. Freshwater richness for 331 fish species in the river Nile.

Fig. S2. Spatial distribution of the BHM.

Fig. S3. Distribution of economic variables in the Nile basin in 2012.

Fig. S4. The distribution of socioeconomic and political factors in the Nile basin.

Table S1. Demographic and trade data for each Nile basin country (listed in order from north to south).

Table S2. General geographic and protected area statistics for each of the Nile basin countries.

## Supplementary Materials

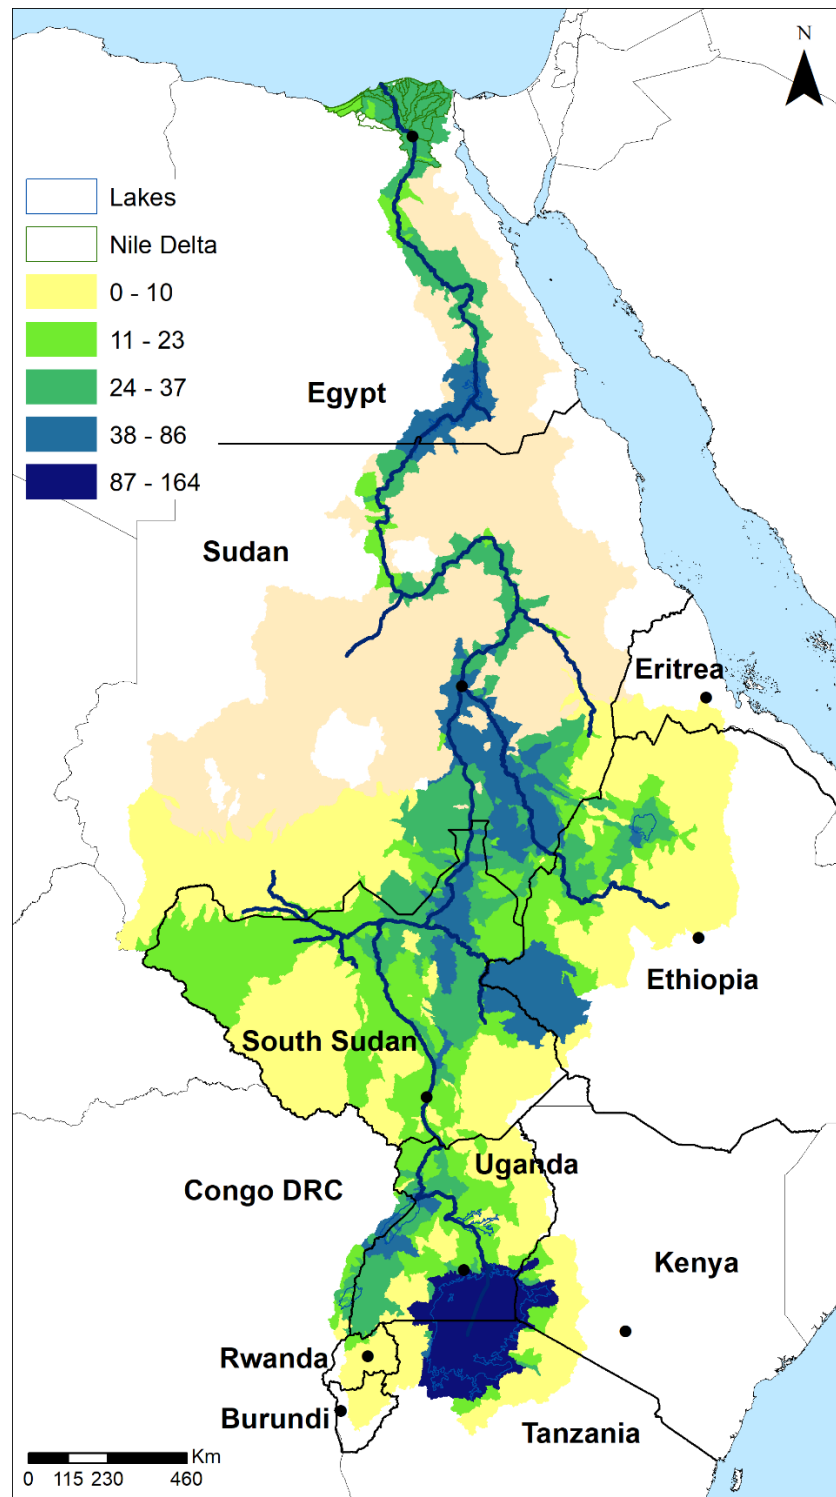

**Fig. S1. Freshwater richness for 331 fish species in the River Nile.** Spatial data obtained from the International Union for the Conservation of Nature (IUCN).

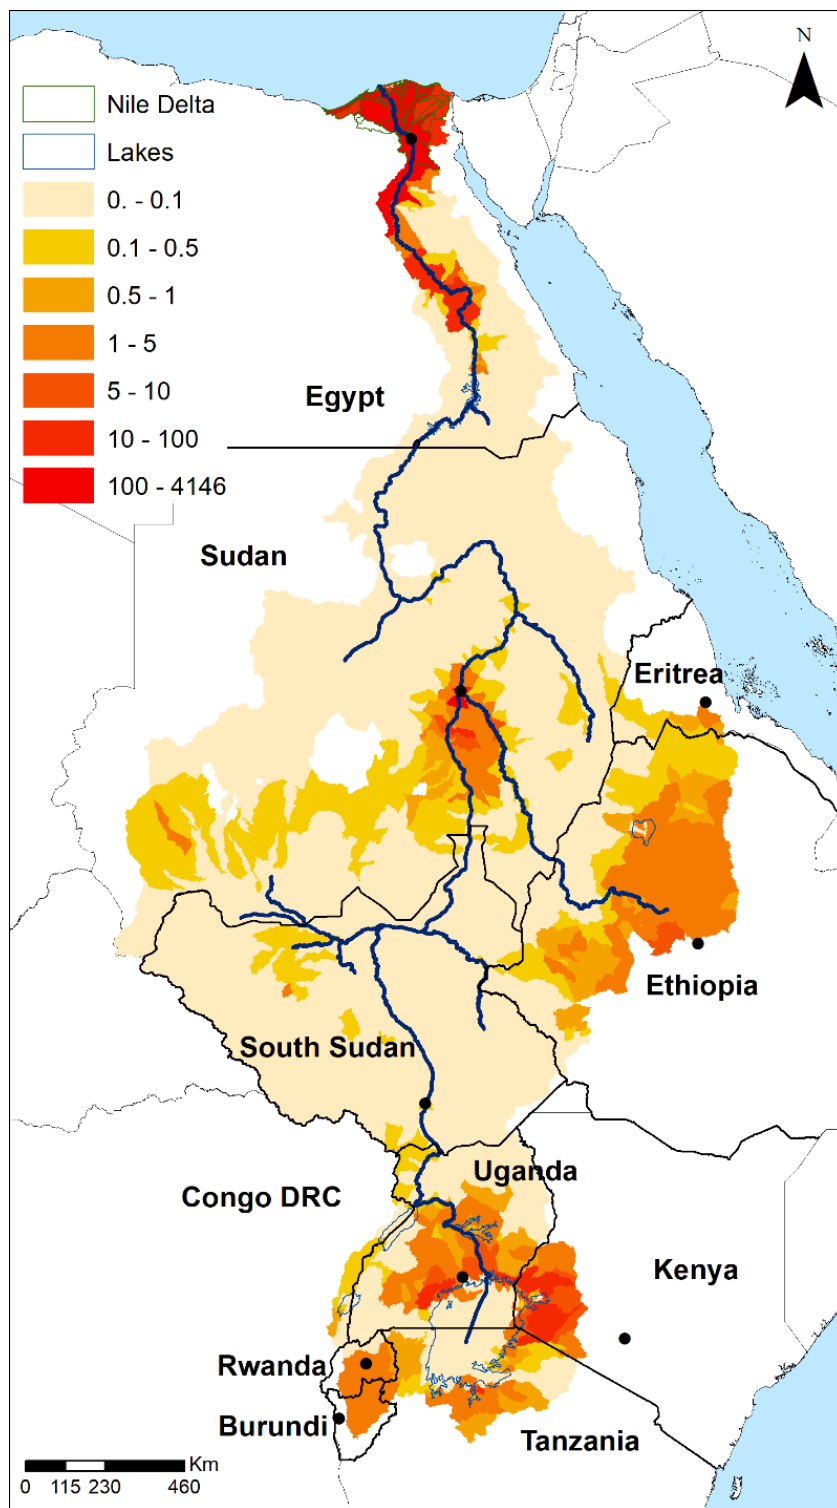

**Fig. S2. Spatial distribution of the BHM measured in millions of USD in the Nile Basin.**

**Table S1. Demographic and trade data for each Nile basin country (listed in order from north to south).**

| Country        | 2012<br>Population<br>(millions) | 2012<br>GDP<br>(USD<br>billions) | 2012<br>GDP<br>per<br>capita<br>(USD) | Purchasing<br>Power Parity<br>(PPP) | Number<br>of Shared<br>borders | Exports                                             |                                                             |                                              | Imports                                                     |                                                                  |                                                  |
|----------------|----------------------------------|----------------------------------|---------------------------------------|-------------------------------------|--------------------------------|-----------------------------------------------------|-------------------------------------------------------------|----------------------------------------------|-------------------------------------------------------------|------------------------------------------------------------------|--------------------------------------------------|
|                |                                  |                                  |                                       |                                     |                                | 2012 Total<br>exports to<br>world (USD<br>millions) | 2012 Total<br>exports to<br>Nile basin<br>(USD<br>millions) | Percentage<br>of exports<br>to Nile<br>basin | 2012 Total<br>imports<br>from<br>world<br>(USD<br>millions) | 2012 Total<br>imports<br>from Nile<br>basin<br>(USD<br>millions) | Percentage<br>of imports<br>within Nile<br>basin |
| Egypt          | 84.0                             | 253.9                            | 3024.2                                | 1.9                                 | 3.0                            | 29417.0                                             | 1112.1                                                      | 3.8                                          | 69865.6                                                     | 459.5                                                            | 0.7                                              |
| Sudan*         | 35.3                             | 51.6                             | 1459.8                                | 2.0                                 | 7.0                            | 3810.0                                              | 98.1                                                        | 13.3                                         | 7511.6                                                      | 98.1                                                             | 9.6                                              |
| Eritrea        | 5.6                              | 3.1                              | 556.9                                 | 6.3                                 | 3.0                            | 403.3                                               | no data                                                     | no data                                      | 383.5                                                       | no data                                                          | no data                                          |
| Ethiopia       | 86.5                             | 39.9                             | 461.3                                 | 6.5                                 | 6.0                            | 2891.3                                              | 33.9                                                        | 1.2                                          | 11912.9                                                     | 33.9                                                             | 1.9                                              |
| South<br>Sudan | 10.4                             | 10.4                             | 997.0                                 | 1.5                                 | 6.0                            | no data                                             | no data                                                     | no data                                      | no data                                                     | no data                                                          | no data                                          |
| Uganda         | 35.6                             | 24.7                             | 693.4                                 | 1057.7                              | 5.0                            | 2357.4                                              | 788.1                                                       | 33.4                                         | 6044.1                                                      | 788.1                                                            | 11.9                                             |
| Kenya          | 42.7                             | 40.7                             | 952.2                                 | 38.0                                | 5.0                            | 5259.2                                              | 1931.2                                                      | 36.7                                         | 15191.5                                                     | 1931.2                                                           | 3.3                                              |
| DRC**          | 69.6                             | 18.1                             | 260.7                                 | 550.8                               | 10.0                           | 5647.4                                              | 115.7                                                       | 2.0                                          | 5307.0                                                      | 724.0                                                            | 13.6                                             |
| Rwanda         | 11.3                             | 6.8                              | 598.9                                 | 257.0                               | 4.0                            | 505.7                                               | 181.9                                                       | 36.0                                         | 1624.3                                                      | 181.9                                                            | 29.6                                             |
| Burundi        | 8.7                              | 2.5                              | 282.4                                 | 563.5                               | 3.0                            | 242.7                                               | 19.5                                                        | 8.1                                          | 1003.1                                                      | 194.3                                                            | 19.4                                             |
| Tanzania       | 47.7                             | 29.9                             | 628.3                                 | 665.6                               | 8.0                            | 5547.2                                              | 507.8                                                       | 1.8                                          | 11715.6                                                     | 507.8                                                            | 6.5                                              |

\*Economic data for Sudan includes South Sudan. Trade statistics obtained from: <http://www.trademap.org/>. Population and GDP statistics obtained from UNECA African Statistical Year Book 2013. Purchase Power Parity (PPP) data obtained from the World Bank: [data.worldbank.org/indicator](http://data.worldbank.org/indicator) and from <http://databank.worldbank.org/data/reports.aspx?source=2&series=PA.NUS.PPP&country>

\*\*Democratic Republic of Congo

**Table S2. General geographic and protected area statistics for each of the Nile basin countries.** Countries are listed from North to South

| <b>Country</b> | <b>Area of Country (km<sup>2</sup>)</b> | <b>Area of Country in Nile Basin (km<sup>2</sup>)</b> | <b>Percentage of Country in the Nile Basin</b> | <b>Area Protected in Country (km<sup>2</sup>)</b> | <b>Percentage of Protected areas in each country (km<sup>2</sup>)</b> | <b>Area Protected in Nile Basin (km<sup>2</sup>)</b> | <b>Percentage of protected areas in the Nile Basin</b> |
|----------------|-----------------------------------------|-------------------------------------------------------|------------------------------------------------|---------------------------------------------------|-----------------------------------------------------------------------|------------------------------------------------------|--------------------------------------------------------|
| Egypt          | 987702                                  | 239172                                                | 24.2                                           | 161049                                            | 16.3                                                                  | 65333                                                | 6.6                                                    |
| Sudan          | 1880789                                 | 1216033                                               | 64.7                                           | 26476                                             | 1.4                                                                   | 26269                                                | 1.4                                                    |
| Eritrea        | 123944                                  | 24963                                                 | 20.1                                           | 6602                                              | 5.3                                                                   | 918                                                  | 0.7                                                    |
| Ethiopia       | 1144968                                 | 359265                                                | 31.4                                           | 229221                                            | 20.0                                                                  | 76024                                                | 6.6                                                    |
| South Sudan    | 626505                                  | 618680                                                | 98.8                                           | 16619                                             | 2.7                                                                   | 16619                                                | 2.7                                                    |
| Uganda         | 241434                                  | 234191                                                | 97.0                                           | 35976                                             | 14.9                                                                  | 35974                                                | 14.9                                                   |
| Kenya          | 597807                                  | 49002                                                 | 8.2                                            | 89120                                             | 14.9                                                                  | 10411                                                | 1.7                                                    |
| Congo DRC      | 2402901                                 | 19145                                                 | 0.8                                            | 242938                                            | 10.1                                                                  | 57867                                                | 2.4                                                    |
| Rwanda         | 25370                                   | 20854                                                 | 82.2                                           | 2530                                              | 10.0                                                                  | 2530                                                 | 10.0                                                   |
| Burundi        | 27284                                   | 13200                                                 | 48.4                                           | 959                                               | 3.5                                                                   | 959                                                  | 3.5                                                    |
| Tanzania       | 941829                                  | 116442                                                | 12.4                                           | 300526                                            | 31.9                                                                  | 84196                                                | 8.9                                                    |
| <b>Totals</b>  | <b>9000533</b>                          | <b>2910945</b>                                        | <b>32.3</b>                                    | <b>1112016</b>                                    | <b>12.4</b>                                                           | <b>377100</b>                                        | <b>4.2</b>                                             |

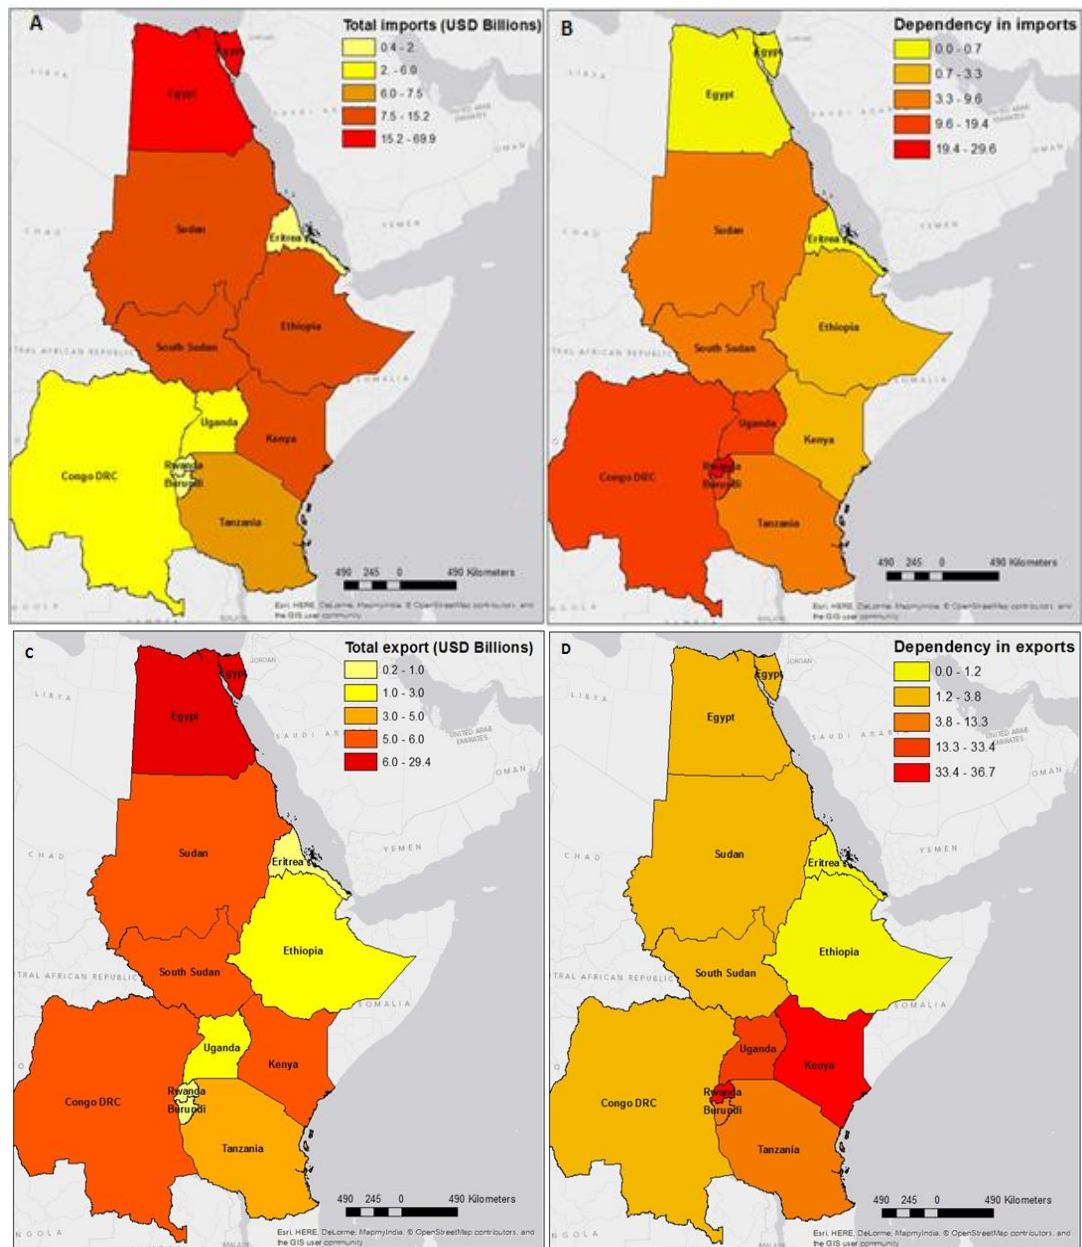

**Fig. S3. Distribution of economic variables in the Nile basin in 2012. (A)** Total annual imports in billions of US dollars. **(B)** Dependency on imports calculated as the percentage of imports from Nile Basin countries. **(C)** Total annual exports in billions of US dollars. **(D)** Dependency on exports calculated as the percentage of exports sent to Nile Basin countries.

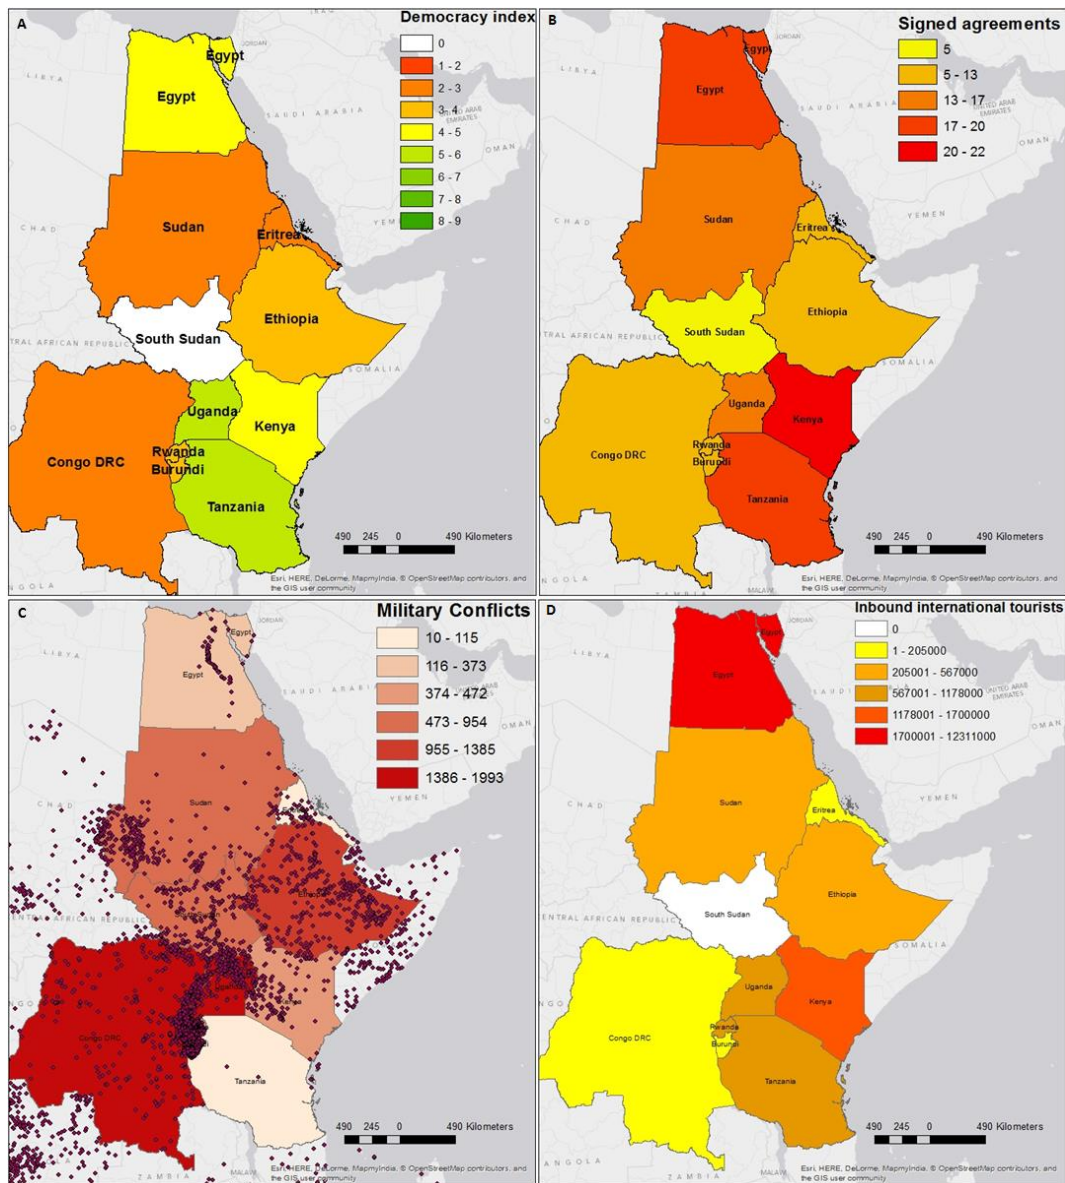

**Fig. S4. The distribution of socioeconomic and political factors in the Nile basin. (A)**

Democracy index. **(B)** The number of signed international agreements relating to conservation and the environment. **(C)** The number of military conflicts between 1989 and 2010, each point represents an individual conflict. **(D)** Number of inbound international tourists in 2012. We used the Corruption Perceptions Index, derived from the World Resources Institute (<https://www.transparency.org/cpi2013/>) and the Democracy Index 2011 from the Economist Intelligence Unit ([www.eiu.com/public/topical\\_report.aspx?campaignid=DemocracyIndex2011](http://www.eiu.com/public/topical_report.aspx?campaignid=DemocracyIndex2011)). There was no data available for South Sudan.
